# Supplementary material for: NLRP6-Dependent Pyroptosis-Related lncRNAs Predict the Prognosis of Hepatocellular Carcinoma
Source: Front Med (Lausanne). 2022 Mar 2;9:760722. doi: 10.3389/fmed.2022.760722 (PMC8924451; doi:10.3389/fmed.2022.760722)
Supplement: Supplementary file 1 [file Table_1.XLSX]

## Sheet: Sheet1
Table S1. Detail gene symbols.
Pyroptosis-related genes	Pyroptosis-related lncRNAs	Differentially expressed lncRNA	Differentially expressed, pyroptosis-reated lncRNA
AIM2	LCT-AS1	AC092171.2	AL365361.1
CASP1	LINC01501	CAPN10-DT	PELATON
CASP3	AC021188.1	AC132192.2	AC004687.1
CASP4	LINC02812	ZKSCAN2-DT	MIR9-3HG
CASP5	MIR223HG	CDKN2B-AS1	LINC02384
CASP6	PDE2A-AS2	AC005332.5	MSC-AS1
CASP8	L3MBTL4-AS1	AC010719.1	LINC02365
CASP9	IFNG-AS1	LINC01093	AL121845.4
ELANE	LINC02528	AL162431.1	CYTOR
GPX4	AC004921.1	SREBF2-AS1	SNHG4
GSDMA	LINC02611	SNHG1	AC099850.3
GSDMB	LINC01724	AL359715.3	AC245060.6
GSDMC	AC099524.1	LINC02875	C1orf220
GSDMD	LINC02195	LINC01311	LINC01719
GSDME（ DFNA5）	LINC00426	LINC01089	SNHG9
IL18	AC245128.3	MYLK-AS1	DNM3OS
IL1B	AC022182.2	AC138356.1	LINC00885
IL6	PTPRN2-AS1	TMED2-DT	HAND2-AS1
NLRC4	LINC02273	AC102953.2	COA6-AS1
NLRP1	AC107959.1	LENG8-AS1	AC022150.4
NLRP2	LINC01550	AL355488.1	AL121832.2
NLRP3	AC006033.2	AC010973.2	RNF139-AS1
NLRP6	LINC00937	RUSC1-AS1	AL117336.2
NLRP7	AL365361.1	HOTTIP	AL512306.2
NOD1	MIR3142HG	BACE1-AS	LINC00894
NOD2	AC110995.1	AL133367.1	AC010761.1
PJVK (DFNB59)	AL121985.1	AC107375.1	AL355488.1
PLCG1	AC138207.5	HAGLR	LINC01089
PRKACA	SATB1-AS1	AC091057.1	SNHG25
PYCARD	MMP2-AS1	MAFG-DT	ASMTL-AS1
SCAF11	LINC01781	LINC02475	ZKSCAN2-DT
TIRAP	PCED1B-AS1	LINC02163	LINC01341
TNF	AL135818.2	CRNDE	AP003352.1
NLRP4	XXYLT1-AS2	ASB16-AS1	AC012615.1
	TRBV11-2	GARS1-DT	GARS1-DT
	LINC01934	MIR4435-2HG	AC016394.1
	CEP250-AS1	AC109322.1	LINC01355
	AL590764.1	AL731569.1	ARHGAP27P1-BPTFP1-KPNA2P3
	AL162414.1	SNHG20	AC132872.1
	PRKCQ-AS1	GAS5	AC027601.1
	PRKAR1B-AS1	RNF139-AS1	AL022322.1
	LINC02086	GIHCG	RUSC1-AS1
	AC019205.1	CCDC18-AS1	AC010719.1
	CHRM3-AS2	AC010280.2	AC087741.1
	AC093010.1	LINC01138	AL161669.3
	TNRC6C-AS1	AC009690.2	AC025265.1
	AC018755.4	LINC00261	AL135999.1
	LINC01356	DLG5-AS1	MIR194-2HG
	LINC02724	TMPO-AS1	AC027801.1
	AC011899.2	B4GALT1-AS1	AC024060.2
	AP002954.1	LINC00205	CCDC18-AS1
	AC011511.5	AC004816.1	AC132192.2
	PIK3CD-AS1	LINC02476	MIR4435-2HG
	PELATON	AL158212.3	TMEM220-AS1
	AC008555.4	AP001469.3	AL161668.4
	LINC01871	AC100810.1	AC015908.3
	LINC02285	LINC00355	SNHG6
	AC010247.1	FOXD2-AS1	MINCR
	LINC02361	LINC02241	AL445524.1
	AC063977.6	LINC01703	AL441992.1
	LINC02084	LINC01419	AC012510.1
	AC007728.2	ST8SIA6-AS1	VPS13B-DT
	COPDA1	GUSBP11	DLG5-AS1
	AC019069.1	PRKAR2A-AS1	AC103706.1
	AL133371.2	AC011294.1	AC016405.3
	LINC02345	ARIH2OS	PRR34-AS1
	AC109446.3	AC232271.1	AL121899.1
	LINC01684	MELTF-AS1	ZFAS1
	AC015712.2	LINC01004	AC109322.1
	MIR155HG	AC139100.2	AC104958.2
	LINC02576	LINC00853	LINC02381
	MIAT	THUMPD3-AS1	AC090152.1
	ZEB2-AS1	PVT1	LOXL1-AS1
	LINC00243	TMEM220-AS1	ZNF337-AS1
	AC004847.1	AL021707.2	AC005089.1
	AC015911.3	LINC02806	AL031673.1
	TRG-AS1	SNHG7	AC005332.5
	ANKRD44-AS1	NPSR1-AS1	LINC02593
	LINC01480	AC099850.3	MYLK-AS1
	AC138207.4	TMEM147-AS1	LINC01093
	C9orf139	AC003102.1	AC004160.1
	AP003774.2	SNHG32	MELTF-AS1
	AL139352.1	SNHG4	AC138356.1
	AL683807.1	AC025171.2	AC145207.5
	AC139720.1	DUXAP8	AC092384.2
	AC004687.1	AL445524.1	LINC02037
	AC107464.2	LINC00528	SNHG7
	LINC02446	CYTOR	BACE1-AS
	AC022075.1	MCM3AP-AS1	ZNF529-AS1
	AC012645.3	AC099508.2	AC020915.2
	AC145098.1	LINC02882	AF117829.1
	AC246787.2	AL022322.1	AC112206.2
	LINC01857	AC022306.2	THUMPD3-AS1
	AC079015.1	AL365181.3	SNHG3
	LINC00861	AL121899.1	AP001065.3
	AC002091.1	AL590666.2	AC012073.1
	AC008083.3	KCNMB2-AS1	AC103740.1
	AC108134.3	TMCC1-AS1	SNHG12
	AC096734.1	SNHG12	AC136475.3
	ZBTB20-AS1	AC009005.1	FAM99B
	AC007569.1	AP003352.1	AC026401.3
	AC020658.5	FEZF1-AS1	AC010280.2
	HCG11	AC012615.1	LINC00844
	DTNB-AS1	LINC01194	FAM99A
	LINC02325	SNHG3	LINC01018
	AL135818.1	LINC01980	AC007773.1
	LINC00539	AC004812.2	SNHG1
	FAM30A	AL160006.1	AL355987.4
	AC006058.1	SNHG25	AP006216.2
	LRRC8C-DT	ASMTL-AS1	F11-AS1
	U62317.3	ZNF337-AS1	NALT1
	LINC00582	AC111000.4	LMNTD2-AS1
	AC009133.3	AC022007.1	LINC02615
	VIM-AS1	AC112484.3	LINC01831
	HAR1A	AFAP1-AS1	RAMP2-AS1
	AC026369.3	LINC00894	AC084018.1
	LINC01281	SBF2-AS1	LINC01702
	AC004865.2	LINC01833	U91324.1
	AL096865.1	LINC01011	MCM3AP-AS1
	AC104078.1	AC110285.2	AC026740.1
	LINC00877	AC087741.1	AC009275.1
	LINC00968	AC026740.1	PIK3CD-AS2
	AC243960.3	AC022211.2	AC040970.1
	AL161785.1	AC004160.1	GSEC
	LINC01943	AL035461.2	LINC00261
	LINC01410	ZNNT1	AL391056.1
	AC243829.4	AC132872.1	SPINT1-AS1
	LINC02828	HRAT92	LINC00853
	LINC01215	AC103706.1	ARIH2OS
	LINC01094	AL161668.4	GIHCG
	LINC01679	AC092535.5	AC022007.1
	HLA-DQB1-AS1	DCST1-AS1	AC034236.2
	ITGA6-AS1	LINC01451	LINC01311
	ITGB2-AS1	LINC00221	AC092171.2
	LINC00920	C2CD4D-AS1	AP002360.1
	AC015819.1	AC016394.1	AC074212.1
	LINC00158	LINC01287	AC012146.1
	LINC00900	AL691420.1	AL359921.2
	LINC00996	FLVCR1-DT	ZNF433-AS1
	LINC02099	AC078846.1	LINC01019
	AC090559.1	LINC00893
	AC034238.1	AL031985.3
	MIR9-3HG	AC020978.4
	LINC00892	DSCR8
	CCR5AS	FBXL19-AS1
	PSMB8-AS1	ARHGAP27P1-BPTFP1-KPNA2P3
	AC007384.1	AC015908.3
	LINC01357	LINC00482
	AC008105.3	AC004540.2
	AL022067.1	AC024060.2
	AC022706.1	SNHG10
	AC243960.1	AC005089.1
	AC004585.1	LINC01224
	AC005632.3	LINC00665
	AC009119.1	AL359921.2
	AC023590.1	AP000873.2
	AC244205.1	AC034236.2
	LINC02416	AC007066.2
	AC093297.2	AL365181.2
	AL357054.4	LINC01355
	AC133644.1	AC009159.3
	LINC02384	AC074212.1
	HCP5	AL592424.1
	AC090204.1	AC139100.1
	MSC-AS1	ELF3-AS1
	AC008033.3	LINC01116
	LINC00540	AC087392.1
	C7orf77	LINC01235
	IRF1-AS1	ZFPM2-AS1
	LINC02391	PCAT6
	USP30-AS1	AP002807.1
	LINC02328	AL138828.1
	AC005083.1	LINC02404
	SENCR	LINC00511
	AC008972.2	LINC01608
	LINC02365	LINC01426
	AP003392.3	MIR600HG
	AC021491.4	AL591895.1
	MUC12-AS1	SNHG21
	AC010501.2	AL390728.6
	AC061992.2	GSEC
	AC002401.2	HCG27
	AC010735.1	TEX41
	ELOVL2-AS1	AC245060.6
	AC027031.2	HAND2-AS1
	AL121845.4	ZMIZ1-AS1
	U91328.1	AF279873.3
	CYTOR	LINC01234
	ADORA2A-AS1	AC011468.1
	AL132639.2	AC012146.1
	LINC01503	KDM4A-AS1
	ITGB1-DT	LINC02365
	LINC00239	MINCR
	ERLNC1	ZNF529-AS1
	AC079209.1	AL080317.2
	MIR325HG	CTD-2201I18.1
	LINC00265	PTOV1-AS2
	SNHG4	MIR194-2HG
	AC099850.3	AC010894.2
	LINC02561	AC079466.1
	AC245060.6	AC027601.1
	AC109460.2	AL135999.1
	AC005562.1	AC079061.1
	AC100861.1	LINC01019
	CDC37L1-DT	AC245052.4
	AL354872.1	AL031673.1
	AF131215.6	AC092803.1
	HOTAIRM1	LUCAT1
	FENDRR	RHPN1-AS1
	AF131215.5	AC020915.2
	AC007114.2	AC239809.3
	AC073957.3	LINC01767
	AC122129.1	AC026401.3
	AP000766.1	AC012236.1
	AC138956.1	FGF14-AS2
	ERICH6-AS1	ZNF433-AS1
	AC068580.1	AC078993.1
	AC005586.1	AC092384.2
	MID1IP1-AS1	AC012409.1
	AP001893.1	AC145207.5
	AL139099.2	AC092171.3
	AC118344.1	AL117336.2
	AP001469.1	AC084018.1
	AC074032.1	AC007292.1
	AC053513.2	AC007773.1
	AP001318.2	AC092117.1
	AC108449.2	CTC-338M12.4
	SLC6A1-AS1	LINC01446
	AC024075.1	AL031123.2
	AC008770.3	GAPLINC
	AC066613.1	LINC01719
	AC093752.3	AL928654.1
	AC027279.1	SSTR5-AS1
	AP001350.1	AL391056.1
	C2-AS1	AL355987.4
	AL031846.2	AC015813.1
	AL022314.1	AC048341.1
	CRYZL2P-SEC16B	SLC9A3-AS1
	AC073046.1	SNHG6
	AC073896.4	LINC00648
	AL731577.2	AC027801.1
	AC009812.3	TSPEAR-AS2
	AC253536.3	STPG3-AS1
	PSMD6-AS2	MAGI2-AS3
	AC023024.1	LINC02615
	AC245060.2	AC242426.2
	AP001271.1	LINC00106
	Z68871.1	AC092171.5
	AC011005.4	AC068987.3
	AC243919.2	AC012676.1
	AC007637.1	LINC02428
	AC005746.1	PP7080
	AC138035.1	AC010761.1
	NADK2-AS1	AF117829.1
	C1orf220	F11-AS1
	AL606834.1	ATP6V0E2-AS1
	NPTN-IT1	AC008735.2
	LINC01719	LINC00607
	AC034102.6	H1-10-AS1
	AC010761.3	AL441992.1
	AP000355.1	AL137186.2
	AC093797.1	LINC01134
	LINC00624	LINC00944
	AC108010.1	SRRM2-AS1
	PAXIP1-AS2	AC010168.2
	AC138956.2	AL512306.2
	FMR1-IT1	SLC16A1-AS1
	AP000866.1	AC245060.5
	AC005154.4	AL121832.2
	LINC01521	BAALC-AS1
	AC015971.1	AC100814.1
	AC008764.2	NALT1
	AC016876.3	AP002360.1
	AC046143.2	AP001830.1
	AC026979.2	AC009275.1
	SNHG9	LINC01341
	AC025917.1	AC010615.2
	AP003392.1	RNF157-AS1
	STARD4-AS1	LY6E-DT
	DNM3OS	DNM3OS
	LINC00885	LINC00896
	WARS2-IT1	COLCA1
	HAND2-AS1	TSPEAR-AS1
	HHIP-AS1	PRECSIT
	AC104083.1	AL109615.3
	AL023803.1	AL365203.2
	CH17-340M24.3	AC007298.2
	AC007114.1	SCTR-AS1
	DLEU2L	LINC01549
	AL133353.1	PPP1R14B-AS1
	LINC02609	COA6-AS1
	AL513327.1	DLGAP1-AS2
	MHENCR	C1orf220
	AL163051.1	AC018553.1
	AC008443.4	ZFAS1
	DCXR-DT	LINC01315
	EXOC3-AS1	AL161669.3
	RAB11B-AS1	LINC01091
	AC026304.1	KCNQ1OT1
	ZSCAN16-AS1	LMNTD2-AS1
	AP006621.3	TYMSOS
	AC008608.2	AL161891.1
	AC010894.1	AC120498.4
	AC108673.3	AC020907.1
	SNHG8	AC012510.1
	COA6-AS1	AC124067.4
	IDH1-AS1	AL021328.1
	AL117332.1	AC129507.2
	AC116366.1	AP002761.4
	AC005288.1	U91324.1
	AP004609.3	LINC02614
	LINC01023	LINC00702
	AC133552.5	AL162582.1
	CATIP-AS1	CEBPA-DT
	AC005076.1	PURPL
	AC005104.1	AC105105.2
	AC079921.1	ELFN1-AS1
	AC012640.2	SOX9-AS1
	RTCA-AS1	AP005262.1
	ANKRD10-IT1	AC139491.2
	AC090587.1	LINC02055
	AL359922.2	LINC01436
	AC125807.2	TBX2-AS1
	AC022973.5	LINC02600
	AC011476.3	LINC01139
	LINC02035	AC084036.1
	AC007878.1	AP006216.2
	EBLN3P	AC121338.2
	ZNF32-AS2	LINC01132
	AL109936.3	AC068580.3
	RASSF1-AS1	AL391095.2
	AC135048.1	SOCS2-AS1
	AC020765.2	AL353622.1
	AP4B1-AS1	PRR34-AS1
	TRIM52-AS1	AC010643.1
	AC027644.3	AC007406.2
	AC008035.1	AC103740.1
	TP53TG1	LINC01151
	AL451165.2	LINC02027
	AC010834.3	LINC01979
	AL132989.1	VPS13B-DT
	AC022150.4	AL513534.2
	AC008915.3	AC016405.3
	LINC02352	CASC15
	AC015917.2	AC104958.2
	AC008946.1	AC104809.1
	AC027682.6	AC008549.1
	LINC01485	MIR9-3HG
	ENTPD3-AS1	PELATON
	CR936218.1	AC010247.2
	TIPARP-AS1	BHLHE40-AS1
	GS1-124K5.4	FAM99A
	AC004771.2	AL391427.1
	FOXN3-AS1	LINC02593
	AP002748.4	MGC27382
	AL161725.1	LINC02037
	AC087482.1	AC115619.1
	AC105339.2	AC025265.1
	MAP3K14-AS1	AC012073.1
	DNAJC27-AS1	AL133338.1
	AL121832.2	AC092490.1
	AC009403.1	AC025171.1
	AC091185.1	LINC02487
	DM1-AS	AP000894.4
	CHKB-DT	AC040970.1
	AC068338.3	CASC9
	AC004908.1	Z98257.1
	MIR4458HG	HOXA-AS2
	AC008982.2	AP003119.1
	AP005899.1	VAC14-AS1
	AC067852.3	PRRT3-AS1
	LINC00216	Z82246.1
	AC027307.2	AC011379.2
	AC023509.3	LINC00885
	YTHDF3-AS1	FAM99B
	FLJ20021	AC095057.3
	AC007406.5	AL355102.4
	ZNF687-AS1	LINC02506
	LINC02166	ZNF793-AS1
	AL121944.2	CERNA1
	PXN-AS1	LINC00535
	LINC00630	GDNF-AS1
	AC138696.2	AL035446.1
	AP001189.3	HNF4A-AS1
	AL157838.1	LINC01474
	AC011374.2	ZBED3-AS1
	AC093110.1	AC253536.6
	AC040169.1	LINC02298
	OSER1-DT	DNAH10OS
	AL049840.2	GATA2-AS1
	KMT2E-AS1	AL355482.1
	AC073332.1	MIR17HG
	AC078795.1	AL365361.1
	PITRM1-AS1	AC112206.2
	AC037459.2	AC060780.1
	AL512791.1	AC068506.1
	ABALON	AC011503.2
	AL354733.3	LINC02864
	AL358115.1	LINC00513
	AL606534.1	LINC00189
	AC002128.1	C5orf66
	DGUOK-AS1	AP000851.2
	AC040162.3	EGFR-AS1
	C3orf35	USP2-AS1
	AC018809.1	LINC02754
	AC010809.2	LINC01843
	RNF139-AS1	LINC02362
	AL117336.2	AC005329.1
	MUC20-OT1	AL590004.3
	SH3BP5-AS1	LINC02363
	AC008870.2	AC022150.4
	AL512306.2	SNHG9
	AC009120.2	LINC02384
	AP001160.1	LINC01702
	AC008467.1	AC111149.2
	RAD51-AS1	AC006205.2
	LINC00894	LINC02315
	AC004148.1	CCDC144NL-AS1
	AC010761.1	GLIS2-AS1
	AL355488.1	AC022613.1
	LINC01089	AP001065.3
	SNHG25	CRIM1-DT
	ASMTL-AS1	ZNF790-AS1
	SEMA3F-AS1	AC022784.1
	PDXDC2P-NPIPB14P	AP003119.2
	AC079174.2	LHFPL3-AS2
	ZKSCAN2-DT	LINC01018
	AC005785.1	AL121845.4
	LINC01341	LINC01124
	AC004918.1	AC020656.2
	AP003352.1	AL161645.1
	AC005899.7	AC027117.2
	AC012615.1	LINC01348
	GARS1-DT	AC018467.1
	AC016394.1	Z97056.1
	LINC01355	AC099684.1
	STAG3L5P-PVRIG2P-PILRB	AL928921.1
	PSPC1-AS2	AC004687.1
	ARHGAP27P1-BPTFP1-KPNA2P3	SCAT8
	AC132872.1	AGAP1-IT1
	AC010300.1	RAMP2-AS1
	AC096642.1	PRDM16-DT
	GHRLOS	LINC02701
	AC004263.1	LINC01831
	AC027601.1	AC237221.1
	LINC00342	AL139385.1
	AC126118.1	SNAP25-AS1
	AL022322.1	LOXL1-AS1
	AL139246.3	LINC01836
	NEAT1	LINC02732
	RUSC1-AS1	MEG3
	AC092119.2	MIR924HG
	LINC00653	AC106795.2
	AC093788.1	LINC02381
	AL359504.1	LINC01152
	AC080129.2	AL035661.1
	AC135050.3	LINC01344
	AC087289.2	AC026462.3
	AL513320.1	MSC-AS1
	AC009283.1	U91319.1
	AC010719.1	AJ009632.2
	AC010542.5	AC025627.1
	AC048341.2	LINC00470
	AC092809.4	IGF2-AS
	AC087741.1	AC124798.1
	AC022762.2	LINC00844
	LINC02367	AC019117.1
	AL161669.3	LINC01671
	AL117379.1	AC136475.3
	SCAT2	PAX8-AS1
	SUGT1-DT	DIO3OS
	AC022167.2	AL121839.2
	AC004253.1	PIK3CD-AS2
	AL136295.2	AC005550.2
	AC025265.1	SPINT1-AS1
	AC104463.2	AC079360.1
	AL135999.1	AL137798.1
	AC109460.3	AL355512.1
	AC007038.1	LINC02029
	AC017083.1	AC090152.1
	AL450384.2	LINC01370
	MIR194-2HG	LINC00992
	AC092118.2	AC026765.3
	ZFHX2-AS1	AC087379.2
	AC245884.8
	AC027801.1
	AL021707.6
	RASGRP3-AS1
	AC004775.1
	AC024060.2
	AL161668.3
	CCDC18-AS1
	AC132192.2
	MIR4435-2HG
	AP003469.2
	LINC00519
	TMEM220-AS1
	AL161668.4
	LINC02313
	AC090192.2
	AC011503.1
	LINC01269
	AC015908.3
	SNHG6
	AC124312.2
	MINCR
	LINC01001
	AC092718.5
	AZIN1-AS1
	AL445524.1
	MIR583HG
	PCCA-AS1
	AC036108.3
	AL133230.1
	AL441992.1
	AC138028.2
	AC012510.1
	CFLAR-AS1
	VPS13B-DT
	LINC01770
	AL049840.6
	AC135050.5
	AL035448.1
	DLG5-AS1
	AC011978.2
	AC006213.2
	AC012181.2
	AC018752.1
	FTX
	AC011912.1
	AC005034.5
	AL606537.1
	LINC02878
	AL161457.2
	AC015922.2
	AL137230.1
	AL353804.1
	AC084125.4
	AL023803.2
	AC103706.1
	AP003465.1
	AC016405.3
	AP001189.1
	AF230666.1
	PRR34-AS1
	AL121899.1
	ARF4-AS1
	UBR5-AS1
	AC064807.4
	SUCLG2-AS1
	ZFAS1
	OIP5-AS1
	AC109322.1
	AC104958.2
	AL109614.1
	AL022316.1
	HOMER3-AS1
	LINC02381
	CFAP58-DT
	AC244453.2
	AC010547.2
	LINC01150
	AL049629.1
	AC105285.1
	AL137186.1
	AGAP2-AS1
	CEROX1
	AC018529.2
	ADPGK-AS1
	MIR503HG
	AL031733.2
	LINC02773
	AC080038.1
	LINC01504
	SOCAR
	AC000403.1
	AC017104.1
	AC015922.3
	AC020659.1
	AC060766.7
	LINC01561
	AC090152.1
	HDAC2-AS2
	AC130371.2
	AC087672.2
	AC004130.2
	MACORIS
	AC008759.3
	LINC01303
	AC004264.1
	AC144831.1
	AC060766.4
	LOXL1-AS1
	LINC01638
	AC020916.1
	HOXB-AS1
	AC245884.11
	AC010776.2
	TMEM26-AS1
	B3GALT5-AS1
	TMEM51-AS1
	AC010735.2
	LINP1
	UCA1
	LINC00865
	AC064805.1
	HCG25
	LINC02723
	LINC00707
	AL049555.1
	AL162424.1
	AC106881.1
	AC087477.4
	AL049775.1
	CCDC26
	LINC00924
	AC087521.1
	ADAMTS9-AS2
	ZNF337-AS1
	AC090136.3
	ADAMTS9-AS1
	AL136162.1
	LINC01197
	AC244153.1
	NKILA
	PCAT19
	LINC00987
	LINC02268
	AL138995.1
	AC002091.2
	AP000812.1
	AC005082.1
	AC005089.1
	CARD8-AS1
	Z97192.3
	CHROMR
	AL359220.1
	LINC00839
	FAM218A
	AC116351.1
	AL358472.2
	GAS1RR
	FAM198B-AS1
	AL078590.2
	C20orf197
	SEPSECS-AS1
	AC129507.1
	AL031673.1
	DUBR
	AC005332.5
	C8orf31
	AC131097.3
	LINC02207
	MEF2C-AS1
	BX322234.1
	AC092809.2
	AC004846.1
	AC105384.1
	AC008957.1
	BX649601.1
	LINC02593
	AC127521.1
	AC091271.1
	MYLK-AS1
	AC010280.1
	AL360181.1
	AP001783.1
	LINC01093
	AC004160.1
	MELTF-AS1
	AC138356.1
	PRR7-AS1
	AC138430.1
	AL355388.1
	LINC01762
	EP300-AS1
	AC145207.5
	AC092384.2
	LINC02037
	SNHG7
	BACE1-AS
	AF111167.2
	AL133215.2
	BX470209.2
	ZNF529-AS1
	AC010336.2
	DDX11-AS1
	AC020915.2
	AC012379.1
	AF117829.1
	LINC02708
	DHRS4-AS1
	AC137056.1
	SPATA3-AS1
	AC004862.1
	AC112206.2
	AC024651.1
	THUMPD3-AS1
	AC019257.1
	SNHG3
	AP001065.3
	AC012073.1
	AC103740.1
	SNHG12
	AC136475.3
	MYG1-AS1
	LINC02768
	FAM99B
	AC026401.3
	LDLRAD4-AS1
	LINC01818
	AC010280.2
	MAPKAPK5-AS1
	GNG12-AS1
	LINC00402
	LINC00844
	LINC02177
	AC005304.2
	LINC01847
	AP006285.1
	FAM99A
	AC004832.5
	LINC01018
	AC007773.1
	LINC02499
	SNHG1
	AL355987.4
	AL161740.1
	AP006216.2
	TPRG1-AS1
	AC009166.1
	F11-AS1
	ECE1-AS1
	AC022509.2
	AC008514.1
	AC016727.1
	YEATS2-AS1
	AC055720.2
	C1orf147
	AL031714.1
	AC106786.1
	AC020907.4
	AL031058.1
	AC068473.3
	AC114810.1
	SNHG28
	AC008014.1
	AC010931.1
	AL354920.1
	LNCOG
	AL731567.1
	AC007750.1
	AC003070.1
	LINC01914
	C10orf55
	AC138028.4
	AC007728.3
	Z84485.1
	PCBP1-AS1
	NALT1
	LMNTD2-AS1
	AC010997.4
	LINC02615
	PARD3-AS1
	U73166.1
	LINC00174
	AC010883.1
	AC068620.2
	AC079322.1
	AC090515.2
	AC087045.2
	AC026362.1
	EPS15-AS1
	AC008760.2
	AC023355.1
	LINC01831
	AP001042.1
	AC092910.3
	AC008592.4
	AL592494.1
	Z93930.2
	RAMP2-AS1
	AL450306.1
	PLCG1-AS1
	AC084018.1
	LINC02608
	LINC01702
	U91324.1
	MCM3AP-AS1
	KIAA1671-AS1
	AC090912.2
	AC006252.1
	LINC01572
	AL137003.1
	RFX5-AS1
	AC026740.1
	AC009275.1
	PYCARD-AS1
	Z99572.1
	PIK3CD-AS2
	AC002398.1
	AC147067.1
	TRAM2-AS1
	AC040970.1
	HMGA1P4
	GSEC
	LINC00261
	AL391056.1
	AC079848.1
	SPINT1-AS1
	AC087741.2
	AC087286.2
	AC015912.3
	AC142472.1
	AC098869.2
	TNFRSF10A-AS1
	AP001020.3
	AC106820.3
	AL121906.2
	AP001505.1
	AC108472.1
	AP001793.1
	AC010331.1
	LINC00853
	AC007622.2
	AC024909.1
	AC011477.3
	AC080013.4
	AC000120.2
	AC010359.2
	AC069281.2
	AL450326.1
	ARRDC1-AS1
	AP000692.1
	AC106796.1
	AC009065.4
	FGD5-AS1
	AP001020.2
	AL118558.3
	ARIH2OS
	GIHCG
	AC005261.3
	ALG13-AS1
	CAMTA1-DT
	AL355802.3
	SNHG11
	AC092718.4
	ZNF503-AS2
	RAB30-DT
	AC104109.4
	AC007278.1
	AL049869.3
	AC073569.2
	AL844908.2
	FLNB-AS1
	AC107021.1
	AC137630.3
	SCOC-AS1
	AC016575.1
	HYI-AS1
	AC091588.3
	AL136988.2
	AC022007.1
	AC034236.2
	LINC01311
	AC040977.1
	BX537318.1
	AC139530.1
	ATXN2-AS
	AC092171.2
	AL139407.1
	U62317.1
	GK-AS1
	AC022558.1
	AC018695.4
	AP002360.1
	AC011445.1
	AC010969.2
	AL645941.1
	TMEM44-AS1
	AL596325.2
	AC090198.1
	PABPC4-AS1
	AL603756.1
	LINC01431
	AC145343.1
	AC036103.1
	AC022784.5
	AC074212.1
	AC115989.1
	AC012146.1
	AL096828.3
	AL139289.1
	HEIH
	AL359921.2
	ZNF433-AS1
	AF131216.1
	AL391121.1
	MKNK1-AS1
	DSCR4-IT1
	LINC01804
	AC007128.2
	DSCR4
	CFAP61-AS1
	LINC01019
	AC022031.2
	LINC02840
	LINC01793
