# Supplementary material for: NLRP6-Dependent Pyroptosis-Related lncRNAs Predict the Prognosis of Hepatocellular Carcinoma
Source: Front Med (Lausanne). 2022 Mar 2;9:760722. doi: 10.3389/fmed.2022.760722 (PMC8924451; doi:10.3389/fmed.2022.760722)
Supplement: Supplementary file 4 [file Table_4.XLSX]

## Sheet: Sheet1
Table S4. The survival analyses of the pyroptosis-related mRNAs.
Gene name	HR	CI	logrank p
AIM2	0.99	0.70-1.39	0.945
CASP1	1.05	0.74-1.48	0.788
CASP3	1.25	0.89-1.76	0.204
CASP4	1.5	1.06-2.12	0.02
CASP5	1.17	0.83-1.65	0.373
CASP6	1.19	0.85-1.68	0.315
CASP8	1.17	0.83-1.65	0.371
CASP9	1.11	0.78-1.56	0.565
ELANE	0.9	0.64-1.27	0.541
GPX4	1.12	0.79-1.58	0.528
GSDMA	1.16	0.82-1.64	0.399
GSDMB	1.1	0.78-1.56	0.58
GSDMC	1.36	0.96-1.92	0.077
GSDMD	1.24	0.88-1.76	0.212
GSDME（ DFNA5）	1.84	1.30-2.60	0.001
IL18	1.13	0.80-1.60	0.481
IL1B	1.42	1.01-2.01	0.042
IL6	1.01	0.72-1.43	0.943
NLRC4	1.41	1.00-1.99	0.049
NLRP1	1.41	0.81-1.61	0.447
NLRP2	1.07	0.76-1.51	0.701
NLRP3	1.25	0.89-1.76	0.205
NLRP6	0.57	0.40-0.80	0.001
NLRP7	0.84	0.59-1.18	0.308
NOD1	1.69	1.20-2.39	0.003
NOD2	1.37	0.97-1.93	0.072
PJVK (DFNB59)	1.02	0.72-1.44	0.898
PLCG1	1.34	0.95-1.89	0.097
PRKACA	0.87	0.62-1.23	0.435
PYCARD	1.2	0.85-1.69	0.304
SCAF11	1.44	1.02-2,03	0.037
TIRAP	1	0.71-1.40	0.979
TNF	1.04	0.73-1.46	0.837
NLRP4	1.1	0.73-1.67	0.64
